# Supplementary material
Source: publisher figshare collection journal article supplement (https://acs.figshare.com/ndownloader/files/4114360)
Supplement: Supplementary file 1 [file 4114360]

## Sheet: PE
Table S1. Summary of PE lipids observed from SW480 and SW620 crude lipid extracts
						SW480 cells					SW620 cells
calculated	calculated	calculated		Total Carbons:Double Bonds		observed			Acyl Chains		observed			Acyl Chains
m/z [M+H]+	m/z (d6-DMBNHS)	m/z [M-H]-				m/z [M+d6-DMBNHS]+	∆ mass	∆ mass (ppm)			m/z [M+d6-DMBNHS]+	∆ mass	∆ mass (ppm)
662.475	798.558	660.461		30:1		798.5566	0.00179192	2.24394	14:0/16:1		798.558	0.00039192	0.490784	12:0/18:1
														14:0/16:1
674.512	810.595	672.497		P-32:1		810.5948	-2.378e-05	-0.0293365	P-16:0/16:1		810.595	0.00017622	0.217396	P-16:0/16:1
676.528	812.61	674.513		P-32:0/O-32:1		812.6095	0.00092542	1.13882	O-16:0/16:1
									P-16:0/16:0
688.491	824.574	686.476		32:2		824.5739	0.00014112	0.171143	16:1/16:1
									14:1/18:1
688.528	824.61	686.513		P-33:1		824.611	-0.0002	-0.242539	P-16:0/17:1		824.61	0	0	P-16:0/17:1
									P-17:0/16:0					P15:0/18:1
									P15:0/18:1
690.507	826.59	688.492		32:1		826.5898	-0.00010968	-0.13269	16:0/16:1		826.59	-9.68e-06	-0.0117108	16:0/16:1
									14:0/18:1					14:0/18:1
														18:0/14:1
690.543	826.626	688.529		P-33:0		826.626	0.0001	0.120974	P-33:0		826.627	-0.0012	-1.45168	P-33:0
692.522	828.605	690.508		32:0		828.6044	0.00093952	1.13386	18:0/14:0
									16:0/16:0
698.512	834.595	696.497		P-34:3		834.5932	0.00157622	1.88861	P-16:0/18:3
700.528	836.61	698.513		P-34:2/O-34:3		836.6103	0.00012542	0.149914	P-16:0/18:2		836.61	0.00032542	0.388974	P-16:0/18:2
									O-16:1/18:2					P-18:1/16:1
									P-18:1/16:1
702.507	838.59	700.492		33:2		838.588	0.0018	2.14646	17:1/16:1
									15:1/18:1
702.543	838.626	700.529		P-34:1/O-34:2		838.6258	0.00027462	0.327464	P-18:0/16:1		838.626	7.462e-05	0.0889789	P-18:0/16:1
									O-18:1/16:1					O-18:1/16:1
									P-16:0/18:1					P-16:0/18:1
									O-16:1/18:1					O-16:1/18:1
704.522	840.605	702.508		33:1		840.605	0	0	15:0/18:1		840.606	-0.0006	-0.713771	17:1/16:0
									17:0/16:1					15:0/18:1
									17:1/16:0					17:0/16:1
														15:1/18:0
704.559	840.642	702.544		P-34:0/O-34:1		840.6410	0.00072382	0.861033	O-16:0/18:1		840.641	0.00072382	0.861033	O-16:0/18:1
									O-18:0/16:1					O-18:0/16:1
									P-16:0/18:0					P-16:0/18:0
									P-18:0/16:0					P-18:0/16:0
706.538	842.621	704.523		33:0		842.62	0.0009	1.0681	18:0/15:0
714.507	850.59	712.492		34:3		850.5896	9.032e-05	0.106185	16:0/18:3
									16:1/18:2
714.543	850.626	712.529		P-35:2		850.626	-0.0001	-0.11756	P-18:1/17:1		850.626	-0.0002	-0.235121	P-35:2
716.522	852.605	714.508		34:2		852.6053	3.952e-05	0.046352	18:1/16:1		852.606	-0.00016048	-0.188223	16:1/18:1
									16:0/18:2					18:1/16:1
														16:0/18:2
716.559	852.642	714.544		P-35:1		852.642	0	0	P-17:0/18:1		852.642	-0.0002	-0.234565	P-17:0/18:1
									P-16:0/19:1					P-18:0/17:1
									P-18:0/17:1					P-16:0/19:1
718.538	854.621	716.523		34:1		854.6209	8.872e-05	0.103812	16:0/18:1		854.621	8.872e-05	0.103812	16:0/18:1
									18:0/16:1					18:0/16:1
718.575	854.657	716.56		O-35:1		854.657	0.0002	0.234012	O-18:0/17:1
									O-17:0/18:1
722.512	858.595	720.497		P-36:5		858.5947	7.622e-05	0.088773	P-16:0/20:5		858.595	-2.378e-05	-0.0276964	P-16:0/20:5
724.528	860.61	722.513		P-36:4/O-36:5		860.6101	0.00032542	0.378127	P-16:0/20:4		860.61	0.00022542	0.26193	P-16:0/20:4
									O-16:0/20:5					O-16:0/20:5
726.543	862.626	724.529		P-36:3/O-36:4		862.6257	0.00037462	0.434279	P-16:0/20:3		862.626	0.00017462	0.202428	P-16:0/20:3
									O-16:0/20:4					O-16:0/20:4
									P-18:1/18:2					P-18:1/18:2
									P-18:0/18:3					P-18:0/18:3
728.559	864.642	726.544		P-36:2/O-36:3		864.6415	0.00022382	0.258859	P-18:1/18:1		864.642	-7.618e-05	-0.0881059	P-18:1/18:1
									P-18:0/18:2					P-18:0/18:2
									O-18:2/18:1					P-16:0/20:2
									O-18:1/18:2					O-18:0/18:3
														O-16:0/20:3
730.538	866.621	728.523		35:2		866.621	-0.0001	-0.115391	17:1/18:1		866.621	0	0	17:1/18:1
730.574	866.657	728.56		P-36:1/O-36:2		866.6572	0.00017302	0.199641	P-18:0/18:1		866.657	7.302e-05	0.0842547	P-18:0/18:1
									O-18:0/18:2					P-20:0/16:1
														P-16:0/20:1
														O-18:0/18:2
732.554	868.637	730.539		35:1		868.637	-0.0001	-0.115123	18:0/17:1		868.637	-0.0001	-0.115123	18:0/17:1
									15:0/20:1					15:0/20:1
									17:0/18:1					17:0/18:1
732.59	868.673	730.575		O-36:1		868.6728	0.00022222	0.255815	O-18:0/18:1		868.673	0.00022222	0.255815	O-18:0/18:1
									O-20:1/16:0					O-20:1/16:0
									O-20:0/16:1					O-20:0/16:1
														O-16:1/20:0
														O-16:0/20:1
														O-18:1/18:0
736.528	872.61	734.513		P-37:5		872.611	-0.0002	-0.229197	P-17:0/20:5		872.611	-0.0011	-1.26059	P-17:0/20:5
738.507	874.59	736.492		36:5		874.5896	9.032e-05	0.103271	16:1/20:4		874.59	0.00019032	0.217611	16:1/20:4
									16:0/20:5					16:0/20:5
738.543	874.626	736.529		P-37:4		874.626	0	0	P-17:0/20:4		874.626	0	0	P-17:0/20:4
740.522	876.605	738.508		36:4		876.6051	0.00023952	0.273236	16:0/20:4		876.605	0.00033952	0.387312	16:0/20:4
									16:1/20:3					16:1/20:3
									18:1/18:3					18:1/18:3
740.559	876.642	738.544		P-37:3		876.642	-0.0001	-0.114072	P-17:0/20:3		876.642	-0.0004	-0.456287	P-17:0/20:3
742.538	878.621	740.523		36:3		878.6210	-1.128e-05	-0.0128383	18:1/18:2		878.621	-0.00021128	-0.240468	18:1/18:2
									18:0/18:3					18:0/18:3
									16:0/20:3					16:0/20:3
									20:2/16:1
742.575	878.657	740.56		O-37:3		878.657	0.0002	0.22762	O-18:0/19:3
744.554	880.637	742.539		36:2		880.6366	3.792e-05	0.0430598	18:1/18:1		880.637	-6.208e-05	-0.0704945	18:1/18:1
									20:1/16:1					20:1/16:1
									18:0/18:2					18:0/18:2
746.569	882.652	744.555		36:1		882.6520	0.00028712	0.325292	18:0/18:1		882.652	0.00018712	0.211997	18:0/18:1
									18:1/18:0					18:1/18:0
									16:1/20:0					16:1/20:0
									16:0/20:1					16:0/20:1
748.528	884.61	746.513		P-38:6		884.6104	2.542e-05	0.0287358	P-16:0/22:6		884.611	-7.458e-05	-0.0843083	P-16:0/22:6
									P-18:1/20:5					P-18:1/20:5
									P-18:0/20:6					P-18:0/20:6
750.543	886.626	748.529		P-38:5/O-38:6		886.6257	0.00037462	0.422523	P-16:0/22:5		886.626	7.462e-05	0.0841617	P-16:0/22:5
									P-18:0/20:5					P-18:0/20:5
									P-18:1/20:4					P-18:1/20:4
									O-16:0/22:6					O-16:0/22:6
752.559	888.642	750.544		P-38:4/O-38:5		888.6413	0.00042382	0.47693	P-18:0/20:4		888.641	0.00022382	0.251868	P-18:0/20:4
									O-16:0/22:5					O-16:0/22:5
									P-16:0/22:4					P-16:0/22:4
									O-18:0/20:5					O-18:0/20:5
														P-18:1/20:3
754.538	890.621	752.523		37:4		890.62	0.0011	1.23509	15:0/22:4		890.619	0.0019	2.13334	17:0/20:4
754.574	890.657	752.56		P-38:3/O-38:4		890.6570	0.00037302	0.418814	O-18:0/20:4		890.657	7.302e-05	0.0819844	O-18:0/20:4
									P-18:0/20:3					P-18:0/20:3
									O-16:0/22:4					O-16:0/22:4
														P-16:0/22:3
756.554	892.637	754.539		37:3		892.636	0.0004	0.448111	17:0/20:3		892.639	-0.0019	-2.12853	17:0/20:3
758.569	894.652	756.555		37:2		894.652	0.0002	0.223551	20:1/17:1		894.653	-0.0004	-0.447101	17:1/20:1
									17:1/20:1					19:1/18:1
									19:1/18:1
758.606	894.689	756.591		P-38:1/O-38:2		894.6885	0.00017142	0.191597	P-20:0/18:1		894.687	0.00137142	1.53285	P-20:0/18:1
									P-18:0/20:1					P-18:0/20:1
									O-18:0/20:2					O-18:0/20:2
									O-16:0/22:1					O-20:0/18:2
760.621	896.704	758.607		O-38:1		896.7041	0.00022062	0.246034	O-20:0/18:1
									O-18:0/20:1
762.543	898.626	760.529		P-39:6		898.625	0.0006	0.667686	P-17:0/22:6
764.522	900.605	762.508		754.54		900.6055	-0.00016048	-0.178191	18:1/20:5		900.606	-0.00026048	-0.289228	16:0/22:6
														18:1/20:5
764.559	900.642	762.544		P-39:5/O-39:6		900.642	0.0001	0.111032	P-17:0/22:5		900.641	0.0004	0.444128	P-17:0/22:5
									O-17:0/22:6					O-17:0/22:6
														P-18:0/21:5
766.538	902.621	764.523		38:5		902.6207	0.00028872	0.319868	18:1/20:4		902.621	0.00018872	0.20908	18:1/20:4
									18:0/20:5					18:0/20:5
									16:0/22:5					16:0/22:5
766.575	902.657	764.56		P-39:4/O-39:5		902.657	0	0	P-39:4		902.656	0.001	1.10784	P-39:4
									O-39:5					O-39:5
768.554	904.637	766.539		38:4		904.6363	0.00033792	0.373542	18:0/20:4		904.636	0.00023792	0.263001	18:0/20:4
									18:1/20:3					18:1/20:3
770.569	906.652	768.555		38:3		906.6518	0.00048712	0.537273	20:2/18:1		906.653	-0.00021288	-0.234798	20:2/18:1
									18:0/20:3					18:0/20:3
									20:1/18:2					20:1/18:2
772.528	908.61	770.513		P-40:8		908.611	-0.0006	-0.660349	P-40:8		908.611	-0.0007	-0.770407	P-40:8
772.585	908.668	770.57		38:2		908.6679	3.632e-05	0.0399706	20:1/18:1		908.668	-0.00016368	-0.180132	20:1/18:1
									22:1/16:1					20:0/18:2
									20:0/18:2					22:1/16:1
									18:0/20:2					20:2/18:0
774.543	910.626	772.529		P-40:7		910.6257	0.00037462	0.411387	P-18:1/22:6		910.626	0.00037462	0.411387	P-18:1/22:6
														P-20:2/20:5
774.601	910.684	772.586		38:1		910.6835	8.552e-05	0.0939075	20:0/18:1		910.684	-1.448e-05	-0.0159001	20:0/18:1
									20:1/10:8					20:1/10:8
									18:0/20:1					18:0/20:1
														18:1/20:0
														16:1/22:0
														22:1/16:0
776.559	912.642	774.544		P-40:6		912.6415	0.00022382	0.245244	P-18:0/22:6		912.642	2.382e-05	0.0261001	P-18:0/22:6
									P-18:1/22:5					P-18:1/22:5
778.538	914.621	776.523		39:6		914.623	-0.0018	-1.96803	39:6
778.574	914.657	776.56		P-40:5/O-40:6		914.6572	0.00017302	0.189164	P-18:0/22:5		914.657	-2.698e-05	-0.0294974	P-18:0/22:5
									O-18:0/22:6					O-18:0/22:6
									P-18:1/22:4					P-20:4/20:1
									P-16:0/24:5					P-18:1/22:4
														P-22:4/18:1
														P-16:0/24:5
780.554	916.637	778.539		39:5		916.636	0.0002	0.218189	39:5		916.636	0.0001	0.109094	39:5
780.59	916.673	778.575		P-40:4/O-40:5		916.6729	0.00012222	0.13333	O-18:0/22:5		916.673	-7.778e-05	-0.0848503	O-18:0/22:5
									P-18:0/22:4					P-18:0/22:4
									P-16:0/24:4					P-16:0/24:4
									P-20:0/20:4					P-20:0/20:4
									O-20:0/20:5					O-20:0/20:5
782.569	918.652	780.555		39:4		918.651	0.0009	0.979696	39:4		918.652	0.0001	0.108855	39:4
784.585	920.668	782.57		39:3		920.668	-0.0002	-0.217234	18:0/21:3		920.668	0	0	18:0/21:3
786.601	922.684	784.586		39:2		922.684	0	0	19:1/20:1
790.538	926.621	788.523		40:7		926.6212	-0.00021128	-0.228011	18:1/22:6		926.621	-0.00021128	-0.228011	18:1/22:6
792.554	928.637	790.539		40:6		928.6369	-0.00026208	-0.28222	18:0/22:6		928.637	-0.00036208	-0.389905	18:0/22:6
									18:1/22:5					18:1/22:5
794.569	930.652	792.555		40:5		930.6523	-1.288e-05	-0.0138398	18:0/22:5		930.653	-0.00021288	-0.228743	18:0/22:5
									20:1/20:4					20:1/20:4
														18:1/22:4
796.585	932.668	794.57		40:4		932.6681	-0.00016368	-0.175497	18:0/22:4		932.668	-6.368e-05	-0.0682772	18:0/22:4
									22:3/18:1					22:3/18:1
									20:0/20:4					20:0/20:4
									20:1/20:3					20:1/20:3
800.616	936.699	798.602		40:2		936.6989	0.00033472	0.35734	22:1/18:1		936.699	0.00053472	0.570856	22:1/18:1
802.632	938.715	800.617		40:1		938.7148	8.392e-05	0.0893988	22:0/18:1		938.716	-0.00111608	-1.18894	22:0/18:1
														18:0/22:1
814.538	950.621	812.523		42:9		950.6189	0.00208872	2.19722	42:9		950.621	0.00038872	0.408912	42:9
822.601	958.684	820.586		42:5		958.6832	0.00038552	0.402135	22:1/20:4
824.616	960.699	822.602		42:4		960.6988	0.00043472	0.452504	24:0/18:1
830.663	966.746	828.649		42:1		966.7455	0.00068232	0.70579	18:1/24:0
852.648	988.731	850.633		44:4		988.7306	-6.688e-05	-0.0676423	24:0/20:4

## Sheet: PA
Table S2. Summary of PA lipids from SW480 and SW620 crude lipid extracts
						SW480 cells					SW620 cells
calculated	calculated	calculated		Total Carbons:Double Bonds		observed			Acyl Chains		observed			Acyl Chains
m/z [M+NH4]+	m/z (d6-DMBNHS)	m/z [M-H]-				m/z [M-H]-	∆ mass	∆ mass (ppm)			m/z [M-H]-	∆ mass	∆ mass (ppm)
638.475	638.475	619.434		30:0		619.434	0.0001	0.156623	14:0/16:0		619.434	-0.0001	-0.156623	14:0/16:0
														16:0/14:0
652.491	652.491	633.45		31:0		633.45	-0.0003	-0.459776	15:0/16:0
652.528	652.528	633.486		0-32:0		633.486	-0.0001	-0.15325	O-16:0/16:0		633.486	-0.0001	-0.15325	O-16:0/16:0
														O-18:0/14:0
664.491	664.491	645.45		32:1		645.45	-0.0002	-0.300982	16:0/16:1		645.45	-0.0002		16:0/16:1
666.507	666.507	647.466		32:0		647.466	0	0	16:0/16:0		647.466	-0.0001	-0.150036	16:0/16:0
														14:0/18:0
678.543	678.543	659.502		P-34:0/O-34:1		659.502	-0.0003	-0.442124	O-16:0/18:1		659.503	-0.0006	-0.884247	O-16:0/18:1
									P-18:0/16:0					P-18:0/16:0
									O-18:0/16:1					O-18:0/16:1
680.522	680.522	661.481		33:0		661.482	-0.0003	-0.440838	16:0/17:0
									18:0/15:0
									17:0/16:0
680.559	680.559	661.518		O-34:0		661.518	-0.0002	-0.293876	O-18:0/16:0		661.518	-0.0004	-0.587752	O-18:0/16:0
									O-16:0/18:0					O-16:0/18:0
692.522	692.522	673.481		34:1		673.481	0	0	16:0/18:1		673.481	0	0	18:1/16:0
									18:1/16:0					16:0/18:1
									18:0/16:1					18:0/16:1
694.538	694.538	675.497		34:0		675.497	0	0	16:0/18:0		675.497	0	0	16:0/18:0
									18:0/16:0					18:0/16:0
706.538	706.538	687.497		35:1		687.497	0	0	17:0/18:1
									18:0/17:1
									19:1/16:0
706.574	706.574	687.533		O-36:1		687.534	-0.0002	-0.283056	O-18:0/18:1		687.534	-0.0007	-0.990695	O-18:0/18:1
									O-16:0/20:1					O-16:0/20:1
718.538	718.538	699.497		36:2		699.497	-0.0002	-0.278343	18:1/18:1		699.497	-0.0001	-0.139171	18:1/18:1
									18:0/18:2					18:0/18:2
720.554	720.554	701.513		36:1		701.513	-0.0002	-0.277564	18:0/18:1		701.513	-0.0001	-0.138782	18:0/18:1
									20:1/16:0					20:1/16:0
									20:0/16:1					20:0/16:1
722.569	722.569	703.528		36:0		703.529	-0.0005	-0.691975	18:0/18:0		703.529	-0.0006	-0.83037	18:0/18:0
									20:0/16:0					20:0/16:0

## Sheet: PS
Table S3. Summary of PS lipids observed from SW480 and SW620 crude lipid extracts
						SW480 cells					SW620 cells
calculated	calculated	calculated		Total Carbons:Double Bonds		observed			Acyl Chains		observed			Acyl Chains
m/z [M+H]+	m/z (d6-DMBNHS)	m/z [M-H]-				m/z [M+d6-DMBNHS]+	∆ mass	∆ mass (ppm)			m/z [M+d6-DMBNHS]+	∆ mass	∆ mass (ppm)
734.497	870.58	732.482		32:1		870.5795	1.852e-05	0.0212732	16:0/16:1		870.58	-0.00018148	-0.208459	16:0/16:1
									16:1/16:0					16:1/16:0
748.549	884.632	746.534		O-34:1/P-34:0		884.6312	0.00035202	0.397928	O-16:0/18:1		884.631	0.00035202	0.397928	O-16:0/18:1
									O-18:1/16:0					P-18:0/16:0
									18:0e/16:1					O-18:0/16:1
760.512	896.595	758.498		34:2		896.5953	-0.00013228	-0.147536	16:1/18:0		896.595	-3.228e-05	-0.0360029	16:1/18:0
									18:1/16:0					16:0/18:1
762.528	898.611	760.513		34:1		898.6105	0.00031692	0.352678	18:0/16:1		898.611	0.00011692	0.130112	18:0/16:1
									18:1/16:0					18:1/16:0
776.544	912.626	774.529		35:1		912.627	-0.0001	-0.109574	18:1/17:0		912.627	-0.0001	-0.109574	18:1/17:0
									18:0/17:1					18:0/17:1
776.58	912.663	774.565		O-36:1		912.6628	5.042e-05	0.0552449	O-18:0/18:1		912.663	-0.00014958	-0.163894	O-18:0/18:1
														O-18:1/18:0
784.512	920.595	782.498		36:4		920.5930	0.00216772	2.35469	16:0/20:4		920.593	0.00176772	1.92019	16:0/20:4
									16:1/20:3					16:1/20:3
									18:1/18:3					18:3/18:1
786.528	922.611	784.513		36:3		922.6093	0.00151692	1.64416	18:1/18:2		922.611	1.692e-05	0.0183393	18:1/18:2
									18:0/18:3					18:0/18:3
									16:0/20:3					16:0/20:3
788.544	924.626	786.529		36:2		924.6264	6.612e-05	0.07151	18:1/18:1		924.626	-3.388e-05	-0.0366418	18:1/18:1
									18:0/18:2					18:0/18:2
									20:1/16:1					20:1/16:1
														16:0/20:2
790.559	926.642	788.545		36:1		926.6420	0.00011532	0.124449	18:0/18:1		926.642	-8.468e-05	-0.0913837	18:0/18:1
						.			18:1/18:0					18:1/18:0
									20:0/16:1					20:0/16:1
804.575	940.658	802.56		37:1		940.658	0.0003	0.318926	19:0/18:1		940.658	0.0001	0.106309	19:0/18:1
									18:0/19:1					18:0/19:1
														20:0/17:1
810.528	946.611	808.513		38:5		946.6103	0.00051692	0.546074	18:1/20:4		946.609	0.00221692	2.34196	18:1/20:4
									20:4/18:1					20:4/18:1
									16:0/22:5					16:0/22:5
									18:0/20:5					18:0/20:5
														20:3/18:2
812.544	948.626	810.529		38:4		948.6248	0.00166612	1.75635	18:0/20:4		948.625	0.00116612	1.22927	20:3/18:1
									18:1/20:3					20:4/18:0
									20:3/18:1					18:0/20:4
									16:0/22:4					16:0/22:4
														18:3/20:1
814.559	950.642	812.545		38:3		950.6418	0.00031532	0.331692	20:2/18:1		950.642	-0.00028468	-0.299461	20:2/18:1
									18:0/20:3					18:0/20:3
														20:1/18:2
														16:0/22:3
816.575	952.658	814.56		38:2		952.6576	0.00016452	0.172696	20:1/18:1		952.658	6.452e-05	0.0677263	18:0/20:2
									18:0/20:2					20:1/18:1
									22:1/16:1					22:1/16:1
														20:0/18:2
818.591	954.673	816.576		38:1		954.6733	0.00011372	0.119119	20:0/18:1		954.673	-8.628e-05	-0.0903765	20:0/18:1
									16:1/22:0					16:1/22:0
									18:0/20:1					18:0/20:1
824.58	960.663	822.565		P-40:4 & O-40:5							960.663	0	0	P-18:1/22:3
														O-18:0/22:5
826.559	962.642	824.545		39:4							962.641	0.0008	0.831046	20:4/19:0
830.591	966.673	828.576		39:2							966.673	0.0005	0.517238	18:1/21:1
832.606	968.689	830.592		39:1		968.689	-0.0002	-0.206465	21:0/18:1		968.69	-0.0008	-0.825858	21:0/18:1
836.544	972.626	834.529		40:6		972.6263	0.00016612	0.170795	18:0/22:6		972.627	-0.00023388	-0.240462	18:0/22:6
									18:1/22:5					18:1/22:5
									16:1/24:5
838.559	974.642	836.545		40:5		974.6424	-0.00028468	-0.292087	18:0/22:5		974.642	-0.00018468	-0.189485	18:0/22:5
									20:1/20:4					20:1/20:4
														16:0/24:5
840.575	976.658	838.56		40:4		976.6572	0.00056452	0.578012	20:0/20:4		976.657	0.00046452	0.475622	20:0/20:4
									18:0/22:4					18:0/22:4
844.606	980.689	842.592		40:2		980.6890	6.292e-05	0.064159	22:1/18:1		980.689	-0.00013708	-0.139779	22:1/18:1
									18:1/22:1					18:1/22:1
									22:0/18:2					20:0/20:2
														22:0/18:2
														24:1/16:1
846.622	982.705	844.607		40:1		982.7047	1.212e-05	0.0123333	22:0/18:1		982.705	-0.00028788	-0.292947	22:0/18:1
									18:1/22:0					18:1/22:0
									24:0/16:1					24:0/16:1
									18:0/22:1					18:0/22:1
850.559	986.642	848.545		37:1		986.64	0.0019	1.92572	18:0/19:1		986.642	-0.0002	-0.202708	18:0/19:1
872.637	1008.72	870.623		42:2		1008.7205	-0.00013868	-0.137481	18:1/24:1
		-2.01465							24:1/18:1
									24:0/18:0
874.653	1010.74	872.638		42:1		1010.7360	1.052e-05	0.0104083	18:1/24:0		1010.74	1.052e-05	0.0104083	18:1/24:0
														24:1/18:0

## Sheet: PG
Table S4. Summary of PG lipids observed from SW480 and SW620 crude lipid extracts
						SW480 cells					SW620 cells
calculated	calculated	calculated		Total Carbons:Double Bonds		observed			Acyl Chains		observed			Acyl Chains
m/z [M+NH4]+	m/z (d6-DMBNHS)	m/z [M-H]-				m/z [M+NH4]+	∆ mass	∆ mass (ppm)			m/z [M+NH4]+	∆ mass	∆ mass (ppm)
738.538	738.538	719.497		32:1		738.538	-0.0006	-0.812416	16:0/16:1		738.538	-0.0003	-0.406208	16:0/16:1
740.544	740.544	721.502		32:0		740.544	-0.0004	-0.540144	16:0/16:0		740.544	-0.0005	-0.67518	16:0/16:0
764.544	764.544	745.502		34:2		764.543	0.0011	1.43877	16:1/18:1		764.542	0.0017	2.22355	16:1/18:1
									16:0/18:2					16:0/18:2
766.559	766.559	747.518		34:1		766.5593	-7.978e-05	-0.104075	16:0/18:1		766.56	-0.00037978	-0.495435	16:0/18:1
									18:1/16:0					18:1/16:0
														18:0/16:1
792.575	792.575	773.534		36:2		792.5754	-0.00053058	-0.669438	18:1/18:1		792.575	-0.00013058	-0.164754	18:1/18:1
794.591	794.591	775.549		36:1		794.5900	0.00051862	0.652688	18:0/18:1		794.59	0.00041862	0.526837	18:0/18:1
838.559	838.559	819.518		40:7		838.558	0.00082022	0.97813	18:1/22:6		838.559	-7.978e-05	-0.0951394	18:1/22:6

## Sheet: PC
Table S5. Summary of PC lipids observed from SW480 and SW620 crude lipid extracts
						SW480 cells					SW620 cells
calculated	calculated	calculated		Total Carbons:Double Bonds		observed			Acyl Chains		observed			Acyl Chains
m/z [M+H]+	m/z (d6-DMBNHS)	m/z [M+CHO2]-				m/z [M+H]+	∆ mass	∆ mass (ppm)			m/z [M+H]+	∆ mass	∆ mass (ppm)
690.543	690.543	734.534		P-30:0/O-30:1		690.5433	-0.00012048	-0.174471	P-16:0/14:0		690.543	-0.00012048	-0.174471	P-16:0/14:0
									O-16:1/14:0					O-16:1/14:0
692.522	692.522	736.513		29:0		692.523	-0.0003	-0.433199	14:0/15:0		692.523	-0.0003	-0.433199	14:0/15:0
692.559	692.559	736.55		O-30:0		692.5588	2.872e-05	0.0414694	O-16:0/14:0		692.559	2.872e-05	0.0414694	O-16:0/14:0
704.522	704.522	748.513		30:1		704.5227	-0.00025558	-0.362771	14:0/16:1		704.523	-0.00025558	-0.362771	14:0/16:1
704.559	704.559	748.55		P-31:0/O-31:1		704.559	-0.0003	-0.425798	P-14:0/17:0		704.559	-0.0004	-0.567731	P-14:0/17:0
									O-14:0/17:1					O-14:0/17:1
706.538	706.538	750.529		30:0		706.5386	-0.00050638	-0.716706	14:0/16:0		706.538	-6.38e-06	-0.00902994	14:0/16:0
									16:0/14:0					16:0/14:0
706.574	706.574	750.565		O-31:0		706.575	-0.0002	-0.283056	O-16:0/15:0		706.575	-0.0003	-0.424584	O-16:0/15:0
716.559	716.559	760.55		P-32:1/O-32:2		716.5594	-0.00057128	-0.797255	P-16:1/16:0		716.559	-0.00027128	-0.378587	P-16:1/16:0
									P-16:0/16:1					P-16:0/16:1
									O-16:1/16:1					O-16:1/16:1
														P-14:0/18:1
718.538	718.538	762.529		31:1		718.539	-0.0005	-0.695857	16:1/15:0		718.539	-0.0006	-0.835029	16:1/15:0
														14:0/17:1
718.574	718.574	762.565		O-32:1		718.5746	-0.00012208	-0.169892	O-16:0/16:1		718.574	7.792e-05	0.108437	O-16:0/16:1
														O-16:1/16:0
720.554	720.554	764.545		31:0		720.554	-0.0006	-0.832693	16:0/15:0		720.554	-0.0007	-0.971475	16:0/15:0
														14:0/17:0
720.59	720.59	764.581		O-32:0		720.5900	0.00012712	0.176411	O-16:0/16:0		720.59	0.00022712	0.315186	O-16:0/16:0
														O-18:0/14:0
728.522	728.522	772.513		32:3		728.5207	0.00174442	2.39446	16:2/16:1		728.521	0.00184442	2.53173	14:1/18:2
									14:1/18:2					14:0/18:3
730.538	730.538	774.529		32:2		730.5385	-0.00040638	-0.556275	16:0/16:2		730.538	-0.00040638	-0.556275	16:0/16:2
									16:1/16:1					16:1/16:1
									14:0/18:2					14:0/18:2
730.574	730.574	774.565		P-33:1/O-33:2		730.575	-0.0005	-0.684393	P-16:0/17:1		730.575	-0.0003	-0.410636	P-16:0/17:1
									O-16:1/17:1					O-16:1/17:1
									P-16:1/17:0					P-16:1/17:0
732.554	732.554	776.545		32:1		732.5540	-0.00025718	-0.351073	16:0/16:1		732.554	-5.718e-05	-0.0780557	16:0/16:1
									14:0/18:1					18:1/14:0
									16:1/16:0					16:1/16:0
732.59	732.59	776.581		O-33:1		732.59	0.0002	0.273004	O-16:0/17:1		732.59	-0.0001	-0.136502	O-16:0/17:1
									O-16:1/17:0					O-16:1/17:0
734.569	734.569	778.56		32:0		734.5691	0.00029202	0.397539	16:0/16:0		734.569	9.202e-05	0.125271	16:0/16:0
734.606	734.606	778.597		O-33:0		734.606			O-16:0/17:0		734.606	-0.0003	-0.408382	O-18:0/15:0
														O-16:0/17:0
740.559	740.559	784.55		O-34:4		740.5570	0.00182872	2.46938	O-16:2/18:2		740.557	0.00192872	2.60441	O-16:2/18:2
														O-16:1/18:3
742.538	742.538	786.529		33:3		742.537	0.0008	1.07739	33:3
742.574	742.574	786.565		O-34:3		742.5740	0.00047792	0.643599	O-16:1/18:2		742.574	0.00057792	0.778265	O-16:1/18:2
														O-16:0/18:3
744.554	744.554	788.545		33:2		744.554	-0.0007	-0.940161	16:1/17:1		744.555	-0.0009	-1.20878	16:1/17:1
744.59	744.59	788.581		P-34:1/O-34:2		744.59047	-0.00034288	-0.460495	O-16:0/18:2		744.59	-7.288e-05	-0.0978794	O-16:0/18:2
									P-16:0/18:1					P-18:0/16:1
														P-16:0/18:1
														P-14:0/20:1
746.569	746.569	790.56		33:1		746.57	-0.001	-1.33946	16:0/17:1		746.571	-0.0012	-1.60735	16:0/17:1
									16:1/17:0					16:1/17:0
746.606	746.606	790.597		O-34:1		746.6055	0.00027632	0.370102	O-16:0/18:1		746.606	0.00017632	0.236162	O-16:0/18:1
														O-18:0/16:1
														O-18:1/16:0
748.585	748.585	792.576		33:0		748.585	-0.0003	-0.400756	16:0/17:0		748.585	0.0002	0.267171	16:0/17:0
748.621	748.621	792.612		O-34:0		748.6202	0.00122552	1.63704	O-18:0/16:0		748.62	0.00112552	1.50346	O-18:0/16:0
														O-16:0/18:0
756.554	756.554	800.545		34:3		756.5536	0.00014282	0.188777	16:1/18:2		756.553	0.00024282	0.320955	16:1/18:2
														16:0/18:3
756.59	756.59	800.581		O-35:3/P-35:2		756.589	0.0013	1.71824	O-35:3		756.59	0.0006	0.793032	O-35:3
									P-35:2					P-35:2
758.569	758.569	802.56		34:2		758.5695	-0.00010798	-0.142347	16:1/18:1		758.569	9.202e-05	0.121307	16:1/18:1
									16:0/18:2					16:0/18:2
758.606	758.606	802.597		O-35:2/P-35:1		758.606	-0.0003	-0.395462	O-16:2/19:1		758.606	-0.0005	-0.659104	O-16:0/19:2
									P-16:1/19:1					P-16:0/19:2
760.585	760.585	804.576		34:1		760.5843	0.00074122	0.974539	16:0/18:1		760.584	0.00064122	0.843062	16:0/18:1
									18:0/16:1					18:0/16:1
760.621	760.621	804.612		O-35:1		760.62	0.0011	1.44619	O-18:0/17:1		760.601	0.0204	26.8202	O-18:0/17:1
762.637	762.637	806.628		O-35:0		762.637	0.0003	0.393372	O-35:0
766.574	766.574	810.565		O-36:5		766.5737	0.00077792	1.0148	O-16:1/20:4		766.574	0.00077792	1.0148	O-16:0/20:5
														O-16:1/20:4
														P-16:0/20:4
														P-16:1/20:3
768.59	768.59	812.581		O-36:4		768.5886	0.00152712	1.98691	O-16:0/20:4		768.588	0.00162712	2.11702	O-16:0/20:4
770.569	770.569	814.56		35:3		770.569	0.0004	0.519097	35:3		770.569	0.0006	0.778645	35:3
770.606	770.606	814.597		P-36:2/O-36:3		770.6052	0.00057632	0.747879	P-36:2		770.605	0.00057632	0.747879	P-18:1/18:1
									O-36:3					O-16:0/20:3
														P-16:1/20:1
														O-18:1/18:2
772.585	772.585	816.576		35:2		772.585	0.0002	0.258871	17:1/18:1		772.585	-0.0001	-0.129436	17:1/18:1
									18:1/17:1					18:1/17:1
772.621	772.621	816.612		P-36:1/O-36:2		772.6209	0.00052552	0.680178	P-18:0/18:1		772.621	0.00042552	0.550748	P-18:0/18:1
									O-18:1/18:1					O-18:1/18:1
														P-16:0/20:1
														P-16:1/20:0
774.601	774.601	818.592		35:1		774.601	0.0002	0.258198	17:0/18:1		774.601	-0.0002	-0.258198	17:0/18:1
									18:0/17:1					18:0/17:1
774.637	774.637	818.628		O-36:1		774.6364	0.00067472	0.871014	O-18:0/18:1		774.636	0.00057472	0.741922	O-18:0/18:1
									O-16:1/20:0					O-16:1/20:0
									O-16:0/20:1					O-16:0/20:1
														O-18:1/18:0
780.554	780.554	824.545		36:5		780.5519	0.00184282	2.36091	16:0/20:5		780.552	0.00164282	2.10469	16:0/20:5
									16:1/20:4					16:1/20:4
780.59	780.59	824.581		P-37:4		780.588	0.0017	2.17784	P-37:4		780.589	0.0014	1.79351	P-37:4
782.606	782.606	826.597		P-37:3		782.605	0.001	1.27778	P-37:3		782.604	0.0014	1.7889	P-37:3
784.585	784.585	828.576		36:3		784.5845	0.00054122	0.689817	16:0/20:3		784.585	0.00034122	0.434905	16:0/20:3
									18:2/18:1					18:1/18:2
784.621	784.621	828.612		O-37:3		784.621	0.0005	0.63725	O-37:3		784.622	-0.0003	-0.38235	O-37:3
786.601	786.601	830.592		36:2		786.6001	0.00059042	0.750597	18:1/18:1		786.6	0.00039042	0.496338	18:1/18:1
														18:0/18:2
786.637	786.637	830.628		O-37:2/P-37:1		786.638	-0.0009	-1.14411	O-37:2
									P-37:1
788.616	788.616	832.607		36:1		788.6151	0.00123962	1.57189	18:0/18:1		788.615	0.00083962	1.06467	18:0/18:1
									16:0/20:1					16:0/20:1
														16:1/20:0
788.653	788.653	832.644		O-37:1		788.653	-0.0002	-0.253597	O-37:1		788.651	0.0014	1.77518	O-37:1
790.574	790.574	834.565		P-38:6		790.573	0.0015	1.89735	P-38:6		790.572	0.002	2.52981	P-38:6
792.59	792.59	836.581		O-38:6/P-38:5		792.5896	0.00052712	0.66506	O-16:0/22:6		792.59	0.00012712	0.160386	O-16:0/22:6
									P-16:0/22:5					P-16:0/22:5
794.569	794.569	838.56		37:5		794.568	0.0018	2.26538	37:5
794.606	794.606	838.597		O-38:5		794.6052	0.00057632	0.72529	O-16:0/22:5		794.605	0.00037632	0.473593	O-16:0/22:5
									O-18:1/20:4					O-18:1/20:4
796.585	796.585	840.576		37:4		796.583	0.002	2.51072	37:4		796.583	0.0019	2.38518	37:4
796.621	796.621	840.612		O-38:4/P-38:3		796.6207	0.00072552	0.910746	O-18:0/20:4		796.621	0.00072552	0.910746	O-18:0/20:4
									P-20:2/18:1					P-20:2/18:1
798.601	798.601	842.592		37:3		798.601	0.0001	0.125219	37:3		798.601	-0.0003	-0.375657	37:3
798.637	798.637	842.628		O-38:3		798.6366	0.00047472	0.594413	O-16:1/22:2		798.637	0.00017472	0.218773	O-18:0/20:3
														O-16:0/22:3
														O-16:1/22:2
800.616	800.616	844.607		37:2		800.616	0	0	37:2		800.616	-0.0001	-0.124904	37:2
800.653	800.653	844.644		P-38:1/O-38:2		800.6526	0.00012392	0.154774	P-16:0/22:1		800.652	0.00032392	0.40457	O-16:0/22:2
									O-16:1/22:1					O-16:1/22:1
														P-16:0/22:1
														P-18:0/20:1
802.632	802.632	846.623		37:1		802.632	0.0002	0.24918	17:0/20:1		802.632	0.0004	0.49836	17:0/20:1
									19:1/18:0					19:1/18:0
802.668	802.668	846.659		O-38:1		802.6680	0.00037312	0.46485	O-38:1		802.668	-0.00012688	-0.158073	O-38:1
804.554	804.554	848.545		38:7		804.554	0.0001	0.124293	38:7		804.553	0.0008	0.99434	38:7
806.569	806.569	850.56		38:6		806.5691	0.00029202	0.362052	16:1/22:5		806.569	9.202e-05	0.114088	16:0/22:6
									22:6/16:0					16:1/22:5
808.585	808.585	852.576		38:5		808.5834	0.00164122	2.02974	20:4/18:1		808.583	0.00174122	2.15342	20:4/18:1
									16:0/22:5					16:0/22:5
														16:1/22:4
808.621	808.621	852.612		O-39:5/P-39:4		808.621	0.0006	0.742004	O-39:5		808.62	0.0016	1.97868	P-39:4
810.601	810.601	854.592		38:4		810.5994	0.00129042	1.59193	20:3/18:1		810.6	0.00119042	1.46857	20:3/18:1
									18:0/20:4					18:0/20:4
									16:0/22:4					16:0/22:4
812.616	812.616	856.607		38:3		812.6161	0.00023962	0.294875	20:2/18:1		812.616	3.962e-05	0.0487561	20:2/18:1
									18:0/20:3					20:3/18:0
									20:1/18:2					18:0/20:3
														20:1/18:2
814.632	814.632	858.623		38:2		814.6317	0.00028882	0.35454	20:1/18:1		814.632	8.882e-05	0.109031	20:1/18:1
									20:2/18:0					20:2/18:0
816.648	816.648	860.638		38:1		816.6472	0.00043802	0.536364	20:0/18:1		816.6476	3.802e-05	0.0465562	20:0/18:1
									20:1/18:0					20:1/18:0
816.684	816.684	860.675		P-39:0/O-39:1		816.684	-0.0005	-0.612232	P-39:0		816.684	-0.0003	-0.367339	P-39:0
									O-39:1					O-39:1
818.606	818.606	862.597		P-40:6/O-40:7		818.6055	0.00027632	0.33755	P-40:6		818.606	0.00017632	0.215391	P-40:6
									O-40:7					O-40:7
820.621	820.621	864.612		O-40:6		820.6214	2.552e-05	0.0310984	O-40:6		820.621	-7.448e-05	-0.0907605	O-40:6
822.637	822.637	866.628		O-40:5		822.6369	0.00017472	0.21239	O-40:5		822.637	-0.00022528	-0.273851	O-40:5
824.653	824.653	868.644		O-40:4/P-40:3		824.653	0.0002	0.242526	O-40:4		824.652	0.0007	0.848842	O-40:4
									P-40:3					P-40:3
828.648	828.648	872.638		39:2		828.647	0.0003	0.362036	39:2		828.647	0.0008	0.965428	39:2
830.663	830.663	874.654		39:1		830.664	-0.0006	-0.722314	39:1
830.7	830.7	874.691		O-40:1		830.699	0.0002	0.240761	O-40:1		830.699	0.0002	0.240761	O-40:1
832.585	832.585	876.576		40:7		832.5850	4.122e-05	0.0495085	40:7		832.585	-5.878e-05	-0.0705994	40:7
834.601	834.601	878.592		40:6		834.6006	9.042e-05	0.108339	40:6		834.601	-0.00010958	-0.131296	40:6
842.663	842.663	886.654		40:2		842.6632	8.722e-05	0.103505	40:2		842.663	-0.00011278	-0.133838	40:2
844.679	844.679	888.67		40:1		844.6786	0.00033642	0.398282	40:1		844.679	0.00033642	0.398282	40:1
872.71	872.71	916.701		42:1		872.7098	0.00043482	0.498241	42:1		872.711	-0.00046518	-0.533029	42:1

## Sheet: PI
Table S6. Summary of PI lipids observed from SW480 and SW620 crude lipid extracts
						SW480 cells					SW620 cells
calculated	calculated	calculated		Total Carbons:Double Bonds		observed			Acyl Chains		observed			Acyl Chains
m/z [M+NH4]+	m/z (d6-DMBNHS)	m/z [M-H]-				m/z [M+NH4]+	∆ mass	∆ mass (ppm)			m/z [M+NH4]+	∆ mass	∆ mass (ppm)
812.565	812.565	793.523		P-32:0		812.5653	-0.00060238	-0.741332	P-32:0
814.58	814.58	795.539		O-32:0		814.5824	-0.00205318	-2.52054	O-32:0
826.544	826.544	807.503		32:1		826.5444	-0.00043748	-0.529288	16:0/16:1		826.545	-0.00133748	-1.61816	16:0/16:1
														18:1/14:0
828.56	828.56	809.518		32:0		828.5598	-0.00018828	-0.227238	16:0/16:0		828.56	-0.00078828	-0.951386	16:0/16:0
														18:0/14:0
852.56	852.56	833.518		34:2		852.5600	-0.00038828	-0.455429	18:1/16:1		852.561	-0.00098828	-1.15919	18:1/16:1
									16:0/18:2					16:0/18:2
854.575	854.575	835.534		34:1		854.5755	-0.00023908	-0.279765	16:0/18:1		854.576	-0.00033908	-0.396782	16:0/18:1
									18:1/16:0					18:1/16:0
									18:0/16:1					18:0/16:1
862.58	862.58	843.539		O-36:4		862.5813	-0.00095318	-1.10503	O-16:0/20:4
868.591	868.591	849.55		35:1		868.591	-0.0002	-0.230258	17:0/18:1		868.591	0.0002	0.230258	17:0/18:1
870.643	870.643	851.602		O-36:0		870.6433	-0.00035638	-0.40933	O-36:0
876.56	876.56	857.518		36:4		876.5601	-0.00048828	-0.557041	16:0/20:4		876.56	-0.00018828	-0.214794	16:0/20:4
878.575	878.575	859.534		36:3		878.5757	-0.00043908	-0.499764	16:0/20:3		878.575	-0.00013908	-0.158302	16:0/20:3
									18:1/18:2					18:1/18:2
									18:0/18:3					18:0/18:3
880.591	880.591	861.55		36:2		880.5910	-8.988e-05	-0.102068	18:1/18:1		880.591	-0.00028988	-0.329188	18:1/18:1
									18:0/18:2					18:0/18:2
									16:0/20:2					16:0/20:2
882.607	882.607	863.565		36:1		882.6068	-0.00024068	-0.272692	18:0/18:1		882.607	-0.00024068	-0.272692	18:0/18:1
									16:0/20:1					16:0/20:1
894.607	894.607	875.565		37:2		894.607	0	0	37:2		894.606	0.0008	0.894248	37:2
896.622	896.622	877.581		37:1		896.623	-0.0006	-0.669178	37:1		896.623	-0.0012	-1.33836	37:1
900.56	900.56	881.518		38:6		900.5583	0.00131172	1.45656	16:0/22:6
									18:1/20:5
902.575	902.575	883.534		38:5		902.5753	-3.908e-05	-0.0432983	18:1/20:4		902.576	-0.00043908	-0.486475	18:1/20:4
									16:0/22:5					16:0/22:5
									18:0/20:5					18:0/20:5
904.591	904.591	885.55		38:4		904.591	-8.988e-05	-0.0993598	18:0/20:4		904.591	-0.00018988	-0.209907	18:0/20:4
									18:1/20:3					18:1/20:3
									16:0/22:4					16:0/22:4
906.607	906.607	887.565		38:3		906.6066	-4.068e-05	-0.0448706	18:0/20:3		906.607	-0.00034068	-0.375775	18:0/20:3
									18:1/20:2					18:1/20:2
908.622	908.622	889.581		38:2		908.6220	0.00020852	0.22949	18:1/20:1		908.622	-0.00019148	-0.210737	18:1/20:1
									18:0/20:2					18:0/20:2
910.638	910.638	891.597		38:1		910.639	-0.0009	-0.988318	18:0/20:1		910.638	-0.0001	-0.109813	18:0/20:1
928.591	928.591	909.55		40:6		928.5909	1.012e-05	0.0108982	18:0/22:6		928.591	1.012e-05	0.0108982	18:0/22:6
									18:1/22:5					18:1/22:5
930.607	930.607	911.565		40:5		930.6066	-4.068e-05	-0.0437134	18:0/22:5		930.607	-0.00054068	-0.580997	18:0/22:5
932.622	932.622	913.581		40:4		932.6223	-9.148e-05	-0.098089	18:0/22:4		932.622	-0.00029148	-0.312538	18:0/22:4

## Sheet: LPE
Table S7. Summary of LPE lipids observed from SW480 and SW620 crude lipid extracts
						SW480 cells					SW620 cells
calculated	calculated	calculated		Total Carbons:Double Bonds		observed			Acyl Chains		observed			Acyl Chains
m/z [M+H]+	m/z (d6-DMBNHS)	m/z [M-H]-				m/z [M+d6-DMBNHS]+	∆ mass	∆ mass (ppm)			m/z [M+d6-DMBNHS]+	∆ mass	∆ mass (ppm)
438.298	574.381	436.283		P-16:0/O-16:1		574.3809	-0.00012668	-0.220551	P-16:0		574.381	7.332e-05	0.127651	P-16:0
									O-16:1					O-16:1
440.314	576.396	438.299		O-16:0		576.3966	-0.00017748	-0.307913	O-16:0		576.397	-0.00037748	-0.654897	O-16:0
450.298	586.381	448.283		P-17:1/O-17:2		586.382	-0.0014	-2.38753	P-17:1		586.38	0.0003	0.511613	P-17:1
														O-17:2
454.293	590.376	452.278		16:0		590.3762	-0.00051258	-0.868227	16:0		590.376	-0.00021258	-0.360076	16:0
466.329	602.412	464.315		P-18:0/O-18:1		602.4122	-0.00012828	-0.212944	P-18:0		602.412	-0.00032828	-0.544943	P-18:0
									O-18:1					O-18:1
468.345	604.428	466.33		O-18:0		604.4281	-0.00037908	-0.627172	O-18:0		604.428	-0.00047908	-0.792618	O-18:0
480.308	616.391	478.294		18:1		616.3915	-0.00016338	-0.265059	18:1		616.391	-6.338e-05	-0.102824	18:1
482.324	618.407	480.309		18:0		618.4070	-1.418e-05	-0.0229299	18:0		618.407	0.00028582	0.462188	18:0
494.324	630.407	492.309		19:1		630.407	-0.0003	-0.475883	19:1		630.406	0.0008	1.26902	19:1
494.36	630.443	492.346		P-20:0/O-20:1		630.4430	0.00037012	0.587079	P-20:0		630.443	0.00057012	0.904316	P-20:0
									O-20:1					O-20:1
500.277	636.36	498.262		20:5		636.3604	-0.00036178	-0.568515	20:5		636.36	-0.00026178	-0.411371	20:5
502.293	638.376	500.278		20:4		638.3759	-0.00021258	-0.333001	20:4		638.376	-0.00021258	-0.333001	20:4
504.308	640.391	502.294		20:3		640.3916	-0.00026338	-0.41128	20:3		640.392	-0.00036338	-0.567434	20:3
526.293	662.376	524.278		22:6		662.3760	-0.00031258	-0.471907	22:6		662.376	-0.00031258	-0.471907	22:6
528.308	664.391	526.294		22:5		664.3917	-0.00036338	-0.546937	22:5		664.392	-0.00026338	-0.396423	22:5

## Sheet: LPS
Table S8. Summary of LPS lipids observed from SW480 and SW620 crude lipid extracts
						SW480 cells					SW620 cells
calculated	calculated	calculated		Total Carbons:Double Bonds		observed			Acyl Chains		observed			Acyl Chains
m/z [M+H]+	m/z (d6-DMBNHS)	m/z [M-H]-				m/z [M+d6-DMBNHS]+	∆ mass	∆ mass (ppm)			m/z [M+d6-DMBNHS]+	∆ mass	∆ mass (ppm)
484.267	620.35	482.252		15:0		620.349	0.0012	1.93439	15:0		620.349	0.0008	1.28959	15:0
498.283	634.365	496.268		16:0		634.365	0.0006	0.945827	16:0		634.365	0.001	1.57638	16:0
508.303	644.386	506.289		O-18:2		644.3863	-4.928e-05	-0.0764759	O-18:2		644.387	-0.00044928	-0.697222	O-18:2
530.288	666.371	528.273		O-20:5		666.3712	-0.00059848	-0.898119	O-20:5		666.371	1.52e-06	0.00228101	O-20:5
540.33	676.413	538.315		19:0		676.413	-0.0003	-0.443516	19:0		676.413	-0.0001	-0.147839	19:0

## Sheet: LPC
Table S9. Summary of LPC lipids observed from SW480 and SW620 crude lipid extracts																	H	1.00782
																	N	14.0031
						SW480 cells					SW620 cells						Form	44.9977
calculated	calculated	calculated		Total Carbons:Double Bonds		observed			Acyl Chains		observed			Acyl Chains
m/z [M+H]+	m/z (d6-DMBNHS)	m/z [M+CHO2]-				m/z [M+H]+	∆ mass	∆ mass (ppm)			m/z [M+H]+	∆ mass	∆ mass (ppm)
482.36	482.36	526.351		O-16:0		482.3605	-2.498e-05	-0.051787	O-16:0		482.36	7.502e-05	0.155527	O-16:0
494.324	494.324	538.315		16:1							494.324	0.00029072	0.588116	16:1
496.34	496.34	540.331		16:0		496.3397	3.992e-05	0.0804288	16:0		496.34	3.992e-05	0.0804288	16:0
522.355	522.355	566.346		18:1		522.3555	-0.00011088	-0.212269	18:1		522.356	-0.00021088	-0.40371	18:1
524.371	524.371	568.362		18:0		524.3711	-6.168e-05	-0.117627	18:0		524.371	0.00033832	0.645192	18:0

## Sheet: SM
Table S10. Summary of SM lipids observed from SW480 and SW620 crude lipid extracts
						SW480 cells					SW620 cells
calculated	calculated	calculated		Total Carbons:Double Bonds		observed			Acyl Chains		observed			Acyl Chains
m/z [M+H]+	m/z (d6-DMBNHS)	m/z [M+CHO2]-				m/z [M+H]+	∆ mass	∆ mass (ppm)			m/z [M+H]+	∆ mass	∆ mass (ppm)
645.497	645.497	689.487		30:2		645.498	-0.0015	-2.32379	30:2		645.498	-0.0014	-2.16887	30:2
675.544	675.544	719.534		32:1		675.5437	-0.00018598	-0.275304	32:1		675.544	-0.00018598	-0.275304	32:1
689.559	689.559	733.55		33:1		689.559	0	0	33:1		689.559	-0.0001	-0.14502	33:1
701.559	701.559	745.55		34:2		701.5594	-0.00023678	-0.337505	34:2		701.559	-0.00033678	-0.480045	34:2
703.575	703.575	747.566		34:1		703.5750	-0.00018758	-0.26661	d18:1/16:0		703.575	-0.00018758	-0.26661	d18:1/16:0
725.559	725.559	769.55		36:4		725.5573	0.00186322	2.56798	36:4		725.558	0.00066322	0.914081	36:4
729.59	729.59	773.581		36:2		729.5904	6.162e-05	0.0844583	36:2		729.591	-0.00033838	-0.463794	36:2
731.606	731.606	775.597		36:1		731.6066	-0.00048918	-0.668638	36:1		731.606	-0.00038918	-0.531953	36:1
759.637	759.637	803.628		38:1		759.638	-0.001	-1.31642	38:1		759.637	0.0006	0.789851	38:1
775.575	775.575	819.566		40:7		775.5767	-0.00188758	-2.43378	40:7		775.576	-0.00098758	-1.27335	40:7
785.653	785.653	829.644		40:2		785.6530	5.842e-05	0.0743585	40:2		785.653	-0.00014158	-0.180207	40:2
787.669	787.669	831.66		40:1		787.6687	7.62e-06	0.00967412	40:1		787.669	7.62e-06	0.00967412	40:1
799.669	799.669	843.66		41:2		799.669	-0.0002	-0.250104	41:2		799.669	-0.0004	-0.500207	41:2
801.684	801.684	845.675		41:1		801.685	-0.0002	-0.249475	41:1		801.684	0	0	41:1
811.669	811.669	855.66		42:3		811.6686	0.00010762	0.132591	42:3		811.669	-0.00039238	-0.483424	42:3
813.684	813.684	857.675		42:2		813.6842	0.00015682	0.192728	42:2		813.684	-0.00014318	-0.175965	42:2
815.7	815.7	859.691		42:1		815.6999	0.00010602	0.129974	42:1		815.7	-9.398e-05	-0.115214	42:1

[truncated: 5 more sheets: Cer, TG, DG, MG, Chol]
